# Supplementary material for: New taxa, including three new genera show uniqueness of Neotropical Nepticulidae (Lepidoptera)
Source: Zookeys. 2016 Oct 31;(628):1–63. doi: 10.3897/zookeys.628.9805 (PMC5126387; doi:10.3897/zookeys.628.9805)
Supplement: Supplementary material 1 — Specimen data for Neotropical Nepticulidae with BOLD data [file zookeys-628-001-s001.xls]

## Sheet: Sheet1
Supplementary File belonging to:	Nieukerken EJ van, Doorenweerd C, Nishida K, Snyers C (2016) New taxa, including three new genera show uniqueness of Neotropical Nepticulidae (Lepidoptera). ZooKeys
Specimen data for Neotropical Nepticulidae
catalogNumber	identifiedBy	basisOfRecord	BarcodeIDentificationNumber	scientificName	identificationQualifer	individualCount	Sex	LifeStage	CollectedStage	Country	stateProvince	AdminDivision2	AdminDivision3	Locality	Collector	ExactStartingDate	ExactEndingDate	DateVerbatim	dateOfEmeregenceStart	dateOfEmeregenceEnd	EventId	EventIdVerbatim	otherCatalogNumber	Notes	typeStatus	EarlierIdentification	CollectionDetail	Habitat	Method	institutionCode	CollectionNote	HostName	HostVerbatim	HostIdentificationQualifer	HostIdentifiedBy	MicroscopicPreparation	AssociatedPreparations	PartsPrepared	PreparationMedium	PreparationMaker	PreparationDate	dateIdentified	verbatimCoordinates	verbatimCoordinateSystem	georeferenceSources	geodeticDatum	decimalLatitude	decimalLongitude	minimumElevationInMeters
BIOUG09441-C02	E.J. van Nieukerken	PreservedSpecimen	BOLD:ACG4756	Acalyptris janzeni		1	1 male	adult	adult	Costa Rica	Guanacaste	Area de Conservacion Guanacaste	Sector Santa Rosa	Bosque San Emilio	Dan Janzen	2012-12-04	2012-12-11				GMP#01817	GMP#01817						Forest	Malaise trap	RMNH, Naturalis Biodoversity Center															GPS	WGS84	10.8438	-85.6138	300
BIOUG09432-B01	E.J. van Nieukerken	PreservedSpecimen	BOLD:ACG4756	Acalyptris janzeni		1	1 male	adult	adult	Costa Rica	Guanacaste	Area de Conservacion Guanacaste	Sector Santa Rosa	Bosque San Emilio	Dan Janzen	2012-11-06	2012-11-13				GMP#01813	GMP#01813						Forest	Malaise trap	RMNH, Naturalis Biodoversity Center															GPS	WGS84	10.8438	-85.6138	300
BIOUG09436-B12	E.J. van Nieukerken	PreservedSpecimen	BOLD:ACG4756	Acalyptris janzeni		1	1 male	adult	adult	Costa Rica	Guanacaste	Area de Conservacion Guanacaste	Sector Santa Rosa	Bosque San Emilio	Dan Janzen	2012-11-20	2012-11-27				GMP#01815	GMP#01815						Forest	Malaise trap	RMNH, Naturalis Biodoversity Center															GPS	WGS84	10.8438	-85.6138	300
BIOUG09436-C06	E.J. van Nieukerken	PreservedSpecimen	BOLD:ACG4756	Acalyptris janzeni		1	1 male	adult	adult	Costa Rica	Guanacaste	Area de Conservacion Guanacaste	Sector Santa Rosa	Bosque San Emilio	Dan Janzen	2012-11-20	2012-11-27				GMP#01815	GMP#01815						Forest	Malaise trap	RMNH, Naturalis Biodoversity Center															GPS	WGS84	10.8438	-85.6138	300
BIOUG10108-C05	E.J. van Nieukerken	PreservedSpecimen	BOLD:ACG4756	Acalyptris janzeni		1	1 male	adult	adult	Costa Rica	Guanacaste	Area de Conservacion Guanacaste	Sector Santa Rosa	Bosque San Emilio	Dan Janzen	2013-01-29	2013-02-05				GMP#01825	GMP#01825						Forest	Malaise trap	RMNH, Naturalis Biodoversity Center															GPS	WGS84	10.8438	-85.6138	300
BIOUG05419-H06	E.J. van Nieukerken	PreservedSpecimen	BOLD:ACG4756	Acalyptris janzeni		1	1 male	adult	adult	Costa Rica	Guanacaste	Area de Conservacion Guanacaste	Sector Santa Rosa	Bosque San Emilio	Dan Janzen	2012-07-31	2012-08-06				GMP#00624	GMP#00624						Forest	Malaise trap	RMNH, Naturalis Biodoversity Center						JCK8232		Male genitalia		JC Koster	2015-04-03				GPS	WGS84	10.8438	-85.6138	300
RMNH.INS.23673	E.J. van Nieukerken	PreservedSpecimen	BOLD:ACG4756	Acalyptris janzeni		1	1 male	adult	adult	Costa Rica	Guanacaste			ACG Santa Rosa, Station	Kenji Nishida	2003-06-22												light sheet	at light	RMNH, Naturalis Biodoversity Center						EvN3673		Male genitalia		E.J. van Nieukerken					google earth	WGS84	10.834	-85.612	300
BIOUG18605-F04	E.J. van Nieukerken	OnlineRecord	BOLD:ACG4756	Acalyptris janzeni	DNA barcode identification	1	unknown	adult	adult	Costa Rica	Guanacaste	Area de Conservacion Guanacaste	Sector Santa Rosa	Bosque San Emilio	Dan Janzen	2013-03-12	2013-03-19				GMP#01830	GMP#01825		specimen not examined, no photo				Forest	Malaise trap	Biodiversity Institute of Ontario, University of Guelph															GPS	WGS84	10.8438	-85.6138	300
BIOUG18276-D11	E.J. van Nieukerken	OnlineRecord	BOLD:ACG4756	Acalyptris janzeni	DNA barcode identification	1	unknown	adult	adult	Costa Rica	Guanacaste	Area de Conservacion Guanacaste	Sector Santa Rosa	Bosque San Emilio	Dan Janzen	2013-01-22	2013-01-29				GMP#01824	GMP#01825		specimen not examined, no photo				Forest	Malaise trap	Biodiversity Institute of Ontario, University of Guelph															GPS	WGS84	10.8438	-85.6138	300
BIOUG18337-A10	E.J. van Nieukerken	OnlineRecord	BOLD:ACG4756	Acalyptris janzeni	DNA barcode identification	1	unknown	adult	adult	Costa Rica	Guanacaste	Area de Conservacion Guanacaste	Sector Santa Rosa	Bosque San Emilio	Dan Janzen	2013-02-05	2013-02-12				GMP#01826	GMP#01825		specimen not examined, no photo				Forest	Malaise trap	Biodiversity Institute of Ontario, University of Guelph															GPS	WGS84	10.8438	-85.6138	300
RMNH.INS.24501	E.J. van Nieukerken	PreservedSpecimen	BOLD:ACY4502	Hesperolyra diskusi		1	1 male	adult	adult	Belize	Cayo Distr.			Chiquibui For. Res., Las Cuevas	R. Puplesis & S. Hill	1998-04-03	1998-04-16								Paratype	Fomoria diskusi Puplesis & Robinson				RMNH, Naturalis Biodoversity Center	donation from BM					EvN4501		Male genitalia, wings	euparal	E.J. van Nieukerken	5-2-2014/wings 4-4-2016	1401			google earth		16.732	-88.988
BMNH.E.1625433	E.J. van Nieukerken	PreservedSpecimen		Hesperolyra diskusi		1	1 male	adult	adult	Belize	Cayo Distr.			Chiquibui For. Res., Las Cuevas	R. Puplesis & S. Hill	1998-04-03	1998-04-16								Paratype	Fomoria diskusi Puplesis & Robinson				BMNH, Natural History Museum London						BM29130		Male genitalia	euparal	A. Diskus	vii.98	1604			google earth		16.732	-88.988
BMNH.E.1625439	E.J. van Nieukerken	PreservedSpecimen		Hesperolyra diskusi		1	1 male	adult	adult	Belize	Cayo Distr.			Chiquibui For. Res., Las Cuevas	R. Puplesis & S. Hill	1998-04-03	1998-04-16								Paratype	Fomoria diskusi Puplesis & Robinson				BMNH, Natural History Museum London						BM28845	BM28847	Male genitalia/ Forewing	euparal	A. Diskus	vi.98	1604			google earth		16.732	-88.988
BMNH.E.1625481	E.J. van Nieukerken	PreservedSpecimen		Hesperolyra diskusi		1	1 male	adult	adult	Belize	Cayo Distr.			Chiquibui For. Res., Las Cuevas	R. Puplesis & S. Hill	1998-04-03	1998-04-16								Paratype	Fomoria diskusi Puplesis & Robinson				BMNH, Natural History Museum London												1604			google earth		16.732	-88.988
BMNH.E.1625477	E.J. van Nieukerken	PreservedSpecimen		Hesperolyra diskusi		1	1 female	adult	adult	Belize	Cayo Distr.			Chiquibui For. Res., Las Cuevas	R. Puplesis & S. Hill	1998-04-03	1998-04-16								Paratype	Fomoria diskusi Puplesis & Robinson				BMNH, Natural History Museum London						BM28846		Male genitalia	euparal	A. Diskus	vi.98	1604			google earth		16.732	-88.988
RMNH.INS.23553	E.J. van Nieukerken	PreservedSpecimen	BOLD:ACG9057	Hesperolyra saopaulensis		1	1 female	adult	larva	Brazil	Sao Paulo			Sao Paulo, Garulhos, park near airport terminal ~	E.J. van Nieukerken	2000-08-19			2000-09-11	2000-09-14	EvN2000133	EvN no 2000133			Holotype	Hesperolyra saopaulensis Van Nieukerken	leafmines	forest remnant without undergrowth	reared from larvae	Universidade Federal do Parana, Coleção de Entomológica Padre Jesus Santiago Moure, Brazil		Myrtaceae	unidentified	may be Eugenia or Myrcia	E.J. van Nieukerken	EvN3553		Female genitalia	euparal	E.J. van Nieukerken		0102		Decimal degrees	google earth	WGS84	-23.4244	-46.4815	700
RMNH.INS.24505	E.J. van Nieukerken	PreservedSpecimen	BOLD:ACG9057	Hesperolyra saopaulensis		1	1 female	adult	larva	Brazil	Sao Paulo			Sao Paulo, Garulhos, park near airport terminal ~	E.J. van Nieukerken	2000-08-19			2000-09-11	2000-09-14	EvN2000133	EvN no 2000133					leafmines	forest remnant without undergrowth	reared from larvae	RMNH, Naturalis Biodoversity Center		Myrtaceae	unidentified	may be Eugenia or Myrcia	E.J. van Nieukerken	EvN4505		Female genitalia, wings	euparal	E.J. van Nieukerken	2014-02-05	0102		Decimal degrees	google earth	WGS84	-23.4244	-46.4815	700
	E.J. van Nieukerken	PreservedSpecimen		Hesperolyra saopaulensis		+		leafmines	vacated	Brazil	Sao Paulo			Sao Paulo, Garulhos, park near airport terminal ~	E.J. van Nieukerken	2000-08-19					EvN2000133	EvN no 2000133-H					leafmines	forest remnant without undergrowth		RMNH, Naturalis Biodoversity Center		Myrtaceae	unidentified	may be Eugenia or Myrcia	E.J. van Nieukerken							0304		Decimal degrees	google earth	WGS84	-23.4244	-46.4815	700
	E.J. van Nieukerken	PreservedSpecimen		Hesperolyra saopaulensis		3		leafmines	larvae	Brazil	Sao Paulo			Sao Paulo, Garulhos, park near airport terminal ~	E.J. van Nieukerken	2000-08-19					EvN2000133	EvN no 2000133-K					leafmines	forest remnant without undergrowth	reared from larvae	RMNH, Naturalis Biodoversity Center		Myrtaceae	unidentified	may be Eugenia or Myrcia	E.J. van Nieukerken							0304		Decimal degrees	google earth	WGS84	-23.4244	-46.4815	700
RMNH.INS.24504	E.J. van Nieukerken	PreservedSpecimen	BOLD:ACU6693	Neotrifurcula EvN4504		1	1 female	adult	adult	Chile	Valparaiso			Parque Nat. La Campana, 6 km E of Olmue	R.T.A. Schouten & H. W. van der Wolf	2001-02-19					station 90							Nothofagus forest near brooklet		RMNH, Naturalis Biodoversity Center						EvN4504		Female genitalia		E.J. van Nieukerken	2014-02-05	0303	33.00S-71.03W	Degrees Minutes	label		-33	-71.05	450
RMNH.INS.23527	E.J. van Nieukerken	PreservedSpecimen	BOLD:ACG8607	Neotrifurcula gielisorum		1	1 male	adult	adult	Chile	Nuble			Bio-Bio (VIII), 2 km N Las Trancas, 70 km E Chilan	C. Gielis & H. W. van der Wolf	2001-01-14					Gielis sta 2001-53			station 63						RMNH, Naturalis Biodoversity Center						EvN3527		Male genitalia		E.J. van Nieukerken		0303	36.54S-71.28W	degrees minutes	label		-36.9	-71.47	1400
RMNH.INS.24503	E.J. van Nieukerken	PreservedSpecimen	BOLD:ACG8607	Neotrifurcula gielisorum		1	1 male	adult	adult	Chile	Nuble			Bio-Bio (VIII), 2 km N Las Trancas, 70 km E Chilan	C. Gielis & H. W. van der Wolf	2001-01-06					Gielis sta 2001-53			station 63	Holotype					RMNH, Naturalis Biodoversity Center						EvN4503		Male genitalia		E.J. van Nieukerken	2014-02-05	0303	36.54S-71.28W	degrees minutes	label		-36.9	-71.47	1400
RMNH.INS.24703	E.J. van Nieukerken	PreservedSpecimen		Neotrifurcula gielisorum		1	1 male	adult	adult	Chile	Curico			Maule (VII), 60 km SE Molina, RN Radal Seite Tazas	C. Gielis & FK Gielis	2000-12-18	2000-12-19				Gielis sta 2000-45	sta 2000-45	RMNH.INS.11624	station 45 / hindlegs DNA						RMNH, Naturalis Biodoversity Center						EvN4703		Male genitalia, wings	euparal	C vd Berg, E. van Nieukerken	2015-02-11	0303	35.28S-71.00W	Degrees Minutes	label		-35.47	-71	1100
	E.J. van Nieukerken	PreservedSpecimen		Neotrifurcula RH2		1	1 male	adult	adult	Chile	Valdivia			20 km S Valdivia, Rincon de la Piedra	Nielsen & Karsholt	1981-11-15					station 15							caught around Podocarpus saligna		ZMUC, Zoological Museum, Natural History Museum of Denmark, Copenhagen						RH SAm2		Male genitalia	euparal	R.B.J. Hoare							-39.9164	-73.1098	180
RMNH.INS.24506	E.J. van Nieukerken	PreservedSpecimen		Ozadelpha conostegiae		1	1 male	adult	larva	Costa Rica	Puntarenas			Monteverde, Estación Biológia Monteverde	Kenji Nishida	2012-03-02			2012-03-31						Holotype			leafmines	reared from larvae	RMNH, Naturalis Biodoversity Center		Conostegia oerstediana	Conostegia oerstediana			EvN4506		Male genitalia		E.J. van Nieukerken	2014-02-05	0102	10.19'08"N-084.48'32"W	Degrees Minutes Seconds			10.3167	-84.8089	1500
RMNH.INS.24679	E.J. van Nieukerken	PreservedSpecimen		Ozadelpha conostegiae		1	1 male	adult	larva	Costa Rica	Puntarenas			Monteverde, Estación Biológia Monteverde	Kenji Nishida	2012-03-02			2012-03-29									leafmines	reared from larvae	RMNH, Naturalis Biodoversity Center		Conostegia oerstediana	Conostegia oerstediana			EvN4679		Male genitalia	euparal	E.J. van Nieukerken	2015-01-23	0102	10.19'08"N-084.48'32"W	Degrees Minutes Seconds	label		10.3167	-84.8089	1500
RMNH.INS.24844	E.J. van Nieukerken	PreservedSpecimen		Ozadelpha conostegiae		1	1 male	adult	larva	Costa Rica	Puntarenas			Monteverde, Estación Biológia Monteverde	Kenji Nishida				2007-08-29									leaf miner	reared from larvae	RMNH, Naturalis Biodoversity Center		Conostegia pitierri	Conostegia pitierri			EvN4844		Male genitalia, pupal exuviae	euparal	E.J. van Nieukerken	2016-05-03	0102	10.19'08"N-084.48'32"W	Degrees Minutes Seconds	label		10.3167	-84.8089	1600
	E.J. van Nieukerken	PreservedSpecimen		Ozadelpha conostegiae		1	1 male	adult	larva	Costa Rica	Alajuela			Grecia, Bosque del Niño	Kenji Nishida		?-xii-2012		2012-12-01	2012-12-31								leaf miner	reared from larvae	RMNH, Naturalis Biodoversity Center		Conostegia oerstediana	Conostegia oerstediana									0102	10.08'32.1"N-084.14'49.5"W	Degrees Minutes Seconds	label		10.1423	-84.2471	1678
	E.J. van Nieukerken	PreservedSpecimen		Ozadelpha conostegiae		1	1 male	adult	larva	Costa Rica	Guanacaste			Monteverde, Santa Elena, going towards Bosque del Nino San Gerardo Station	Kenji Nishida				2012-04-23					abdomen missing				leaf miner	reared from larvae	RMNH, Naturalis Biodoversity Center		Conostegia oerstediana	Conostegia oerstediana									0102	10.21'25"N-084.47'35.1"W	Degrees Minutes Seconds	label		10.3501	-84.7931	1500
	E.J. van Nieukerken	PreservedSpecimen		Ozadelpha conostegiae		1	1 male	adult	larva	Costa Rica	Puntarenas			Monteverde, Estación Biológia Monteverde	Kenji Nishida	2012-03-02			2012-03-31									leafmines	reared from larvae	RMNH, Naturalis Biodoversity Center		Conostegia oerstediana	Conostegia oerstediana									0102	10.19'08"N-084.48'32"W	Degrees Minutes Seconds	label		10.3167	-84.8089	1500
	E.J. van Nieukerken	PreservedSpecimen		Ozadelpha conostegiae		3	2 males, 1 female	adult	larva	Costa Rica	Puntarenas			Monteverde, Estación Biológia Monteverde	Kenji Nishida	2012-03-02			2012-03-29									leafmines	reared from larvae	RMNH, Naturalis Biodoversity Center		Conostegia oerstediana	Conostegia oerstediana									0102	10.19'08"N-084.48'32"W	Degrees Minutes Seconds	label		10.3167	-84.8089	1500
RMNH.INS.24847	E.J. van Nieukerken	PreservedSpecimen		Ozadelpha conostegiae		1	1 female	adult	larva	Costa Rica	Puntarenas			Monteverde, Estación Biológia Monteverde	Kenji Nishida	2012-03-02			2012-03-29									leafmines	reared from larvae	RMNH, Naturalis Biodoversity Center		Conostegia oerstediana	Conostegia oerstediana			EvN4847						0102	10.19'08"N-084.48'32"W	Degrees Minutes Seconds	label		10.3167	-84.8089	1500
RMNH.INS.24704	E.J. van Nieukerken	PreservedSpecimen		Ozadelpha conostegiae		1	1 female	adult	larva	Costa Rica	Guanacaste			Monteverde, Santa Elena, going towards Bosque del Nino San Gerardo Station	Kenji Nishida				2012-04-23					3 female abdomens loose together in capsule				leaf miner	reared from larvae	RMNH, Naturalis Biodoversity Center		Conostegia oerstediana	Conostegia oerstediana			EvN4704		wings	euparal	E.J. van Nieukerken	2015-02-11	0102	10.21'25"N-084.47'35.1"W	Degrees Minutes Seconds	label		10.3501	-84.7931	1500
	E.J. van Nieukerken	PreservedSpecimen		Ozadelpha conostegiae		2	2 females	adult	larva	Costa Rica	Guanacaste			Monteverde, Santa Elena, going towards Bosque del Nino San Gerardo Station	Kenji Nishida				2012-04-23					3 female abdomens loose together in capsule with 24704				leaf miner	reared from larvae	RMNH, Naturalis Biodoversity Center		Conostegia oerstediana	Conostegia oerstediana									0102	10.21'25"N-084.47'35.1"W	Degrees Minutes Seconds	label		10.3501	-84.7931	1500
RMNH.INS.24680	E.J. van Nieukerken	PreservedSpecimen	BOLD:ACU6274	Ozadelpha EvN4680		1	1 female	adult	adult	Costa Rica	Puntarenas			Monteverde, Estación Biológia Monteverde	Kenji Nishida	2012-03-02												on upperside of Conostegia oerstediana leaf along the vein		RMNH, Naturalis Biodoversity Center		Conostegia oerstediana	Conostegia oerstediana			EvN4680		Female genitalia	euparal	E.J. van Nieukerken	2015-01-23	0102	10.19'08"N-084.48'32"W	Degrees Minutes Seconds	label		10.3167	-84.8089	1500
RMNH.INS.24037	E.J. van Nieukerken	PreservedSpecimen	BOLD:ACG8765	Stigmella costaricensis		1	1 male	adult	adult	Costa Rica	San José			Parque Nacional Chirripó, Llano Bonito, Refugio	Kenji Nishida	2009-02-19	2009-02-20												at light	RMNH, Naturalis Biodoversity Center						EvN4037		Male genitalia	euparal	E.J. van Nieukerken	2010-03-25	1003	09.27.16N- 083.32.41W	Degrees Minutes Seconds			9.45	-83.5447	2492
	E.J. van Nieukerken	PreservedSpecimen		Stigmella gallicola		1	1 male	adult	larva	Costa Rica	Alajuela			Parque Nacional Volcán Tenorio	Kenji Nishida				2007-06-20									gall maker, young leaf veins	reared from larvae	RMNH, Naturalis Biodoversity Center		Hampea appendiculata	Hampea appendiculata									1602	10°36’42.1”N, 84°59’35.2”W	Degrees Minutes Seconds					982
	E.J. van Nieukerken	PreservedSpecimen		Stigmella gallicola		1	1 male	adult	larva	Costa Rica	Heredia			Puerto Viejo de Sarapiqui, Trimbina Biological Reserve	Kenji Nishida				2003-01-18									gall inducer on young leaf veins	reared from larvae	RMNH, Naturalis Biodoversity Center		Hampea appendiculata	Hampea appendiculata			JCK15024		Male genitalia	euparal	JC Koster	2007-08-30	1602			google earth	WGS84	10.416	-84.121	170
RMNH.INS.23672	E.J. van Nieukerken	PreservedSpecimen	BOLD:ACG9386	Stigmella gallicola		1	1 male	adult	larva	Costa Rica	Puntarenas			Monteverde, Estación Biológica Monteverde	Kenji Nishida				2001-10-26									gall inducer on young leaf veins	reared from larvae	RMNH, Naturalis Biodoversity Center		Hampea appendiculata	Hampea appendiculata			EvN3672		Male genitalia		E.J. van Nieukerken		1602	10.19'08"N-084.48'32"W	Degrees Minutes Seconds			10.3167	-84.8089	1500
RMNH.INS.23739	E.J. van Nieukerken	PreservedSpecimen	BOLD:ACG9386	Stigmella gallicola		2	2 females	adult	larva	Costa Rica	Heredia			Puerto Viejo de Sarapiqui, OTS La Selva Station, main bridge	Kenji Nishida				2002-05-02	2002-05-05								gall inducer on young leaf veins	reared from larvae	RMNH, Naturalis Biodoversity Center		Hampea appendiculata	Hampea appendiculata			EvN3739		Female genitalia		E.J. van Nieukerken		1602			google earth	WGS84	10.432	-84.005	110
BIOUG24701-G07	E.J. van Nieukerken	PreservedSpecimen	BOLD:ACG9386	Stigmella gallicola	BIN Taxonomy Match	1		adult	adult	Costa Rica	Guanacaste	Area de Conservacion Guanacaste	Sector San Cristobal, Estacion San Gerardo		DH Janzen, W Hallwachs	2014-02-17	2014-02-24								Holotype	Stigmella gallicola van Nieukerken & Nishida			Malaise trap	Biodiversity Institute of Ontario, University of Guelph														Decimal Degrees		WGS84	10.88	-85.389	575
RMNH.INS.24036	E.J. van Nieukerken	PreservedSpecimen	BOLD:ACG8514	Stigmella intronia		1	1 male	adult	adult	Costa Rica	San José			Parque Nacional Chirripó, Llano Bonito, Refugio	Kenji Nishida	2009-09-19	2009-02-20												at light	RMNH, Naturalis Biodoversity Center						EvN4036		Male genitalia	euparal	E.J. van Nieukerken	2010-03-25	1003	09.27.16N- 083.32.41W	Degrees Minutes Seconds			9.45	-83.5447	2492
RMNH.INS.24218	E.J. van Nieukerken	PreservedSpecimen	BOLD:ACG9223	Stigmella molinensis		1	1 male	adult	larva	Peru	Lima			Universidad Agraria de la Molina	C. Snyers	2010-12-01			2010-12-16						Holotype		leafmines		reared from larvae	Museo de Entomología "Klaus Raven Büller", Universidad Agrária de la Molina, Lima, Peru		Salix humboldtii	Salix humboldtii		C. Snyers	EvN4218		Male genitalia		E.J. van Nieukerken				Decimal Degrees	C Snyers	WGS84	-12.086	-76.945	240
RMNH.INS.24812	E.J. van Nieukerken	PreservedSpecimen	BOLD:ACG9223	Stigmella molinensis		1	1 male	adult	larva	Peru	Lima			Universidad Agraria de la Molina	C. Snyers	2014-12-15											leafmines		reared from larvae	RMNH, Naturalis Biodoversity Center		Salix humboldtiana	Salix humboldtiana		C. Snyers	EvN4812		Male genitalia	euparal	E.J. van Nieukerken	2016-02-16	1602	-12.086869, -76.944434	Decimal Degrees	C Snyers	WGS84	-12.0869	-76.9444	240
RMNH.INS.24219	E.J. van Nieukerken	PreservedSpecimen	BOLD:ACG9223	Stigmella molinensis		1	1 female	adult	larva	Peru	Lima			Universidad Agraria de la Molina	C. Snyers	2010-12-01			2010-12-16								leafmines		reared from larvae	RMNH, Naturalis Biodoversity Center		Salix humboldtii	Salix humboldtii		C. Snyers	EvN4219		Female genitalia		E.J. van Nieukerken				Decimal Degrees	C Snyers	WGS84	-12.086	-76.945	240
	E.J. van Nieukerken	PreservedSpecimen		Stigmella molinensis		1	1 female	adult	larva	Peru	Lima			Universidad Agraria de la Molina	C. Snyers	2010-01-19			40210					abdomen and left wings missing			leafmines		reared from larvae	RMNH, Naturalis Biodoversity Center		Salix humboldtiana	Salix humboldtiana		C. Snyers							1602		Decimal Degrees	C Snyers	WGS84	-12.086	-76.945	240
	E.J. van Nieukerken	PreservedSpecimen		Stigmella molinensis		1	1 female	adult	larva	Peru	Lima			Universidad Agraria de la Molina	C. Snyers	2010-12-01			40528					abdomen missing			leafmines		reared from larvae	RMNH, Naturalis Biodoversity Center		Salix humboldtiana	Salix humboldtiana		C. Snyers	EvN4219		Female genitalia		E.J. van Nieukerken				Decimal Degrees	C Snyers	WGS84	-12.086	-76.945	240
	E.J. van Nieukerken	PreservedSpecimen		Stigmella molinensis		1	1 female	adult	larva	Peru	Lima			Universidad Agraria de la Molina	C. Snyers	2013-01-01	41305	i.2013									leafmines		reared from larvae	RMNH, Naturalis Biodoversity Center		Salix humboldtiana	Salix humboldtiana		C. Snyers							1602		Decimal Degrees	C Snyers	WGS84	-12.086	-76.945	240
	E.J. van Nieukerken	PreservedSpecimen		Stigmella molinensis		1	1 female	adult	larva	Peru	Lima			Universidad Agraria de la Molina	C. Snyers	2014-12-15											leafmines		reared from larvae	RMNH, Naturalis Biodoversity Center		Salix humboldtiana	Salix humboldtiana		C. Snyers							1602	-12.086869, -76.944434	Decimal Degrees	C Snyers	WGS84	-12.0869	-76.9444	240
	E.J. van Nieukerken	PreservedSpecimen		Stigmella molinensis		3	3 females	adult	larva	Peru	Lima			Universidad Agraria de la Molina	C. Snyers	2013-12-01	31-11-2013	xii.2013									leafmines		reared from larvae	RMNH, Naturalis Biodoversity Center		Salix humboldtiana	Salix humboldtiana		C. Snyers							1602		Decimal Degrees	C Snyers	WGS84	-12.086	-76.945	240
	E.J. van Nieukerken	PreservedSpecimen		Stigmella molinensis		6		leafmines	larva	Peru	Lima			Universidad Agraria de la Molina	C. Snyers	2014-12-15	41995										leafmines		reared from larvae	RMNH, Naturalis Biodoversity Center		Salix humboldtiana	Salix humboldtiana		C. Snyers							1602	-12.086869, -76.944434	Decimal Degrees	C Snyers	WGS84	-12.0869	-76.9444	240
BIOUG13956-F02	E.J. van Nieukerken	PreservedSpecimen	BOLD:ACN0764	Stigmella schinivora		1	1 male	adult	adult	Argentina	Misiones	Obera		CIAR	Pablo Tubaro	2013-10-24	2013-10-31				GMP#05157	GMP#05157							Malaise trap	Museo Argentino de Ciencias Naturales, Bernardino Rivadavia						EvN4834		Male genitalia + whole body	Euparal	E.J. van Nieukerken	2016-03-17	1603		Decimal Degrees		WGS84	-27.445	-54.94	147
BIOUG13587-H11	E.J. van Nieukerken	PreservedSpecimen	BOLD:ACN0764	Stigmella schinivora		1	1 male	adult	adult	Argentina	Misiones	Obera		CIAR	Pablo Tubaro	2013-09-26	2013-10-03				GMP#05155	GMP#05155							Malaise trap	Museo Argentino de Ciencias Naturales, Bernardino Rivadavia												1603		Decimal Degrees		WGS84	-27.445	-54.94	147
RMNH.INS.24500	E.J. van Nieukerken	PreservedSpecimen	BOLD:ACN0764	Stigmella schinivora		1	1 male	adult	larva	Argentina	Misiones			Cataratas del Iguazú	E.J. van Nieukerken	2000-08-27			2000-09-14	2000-09-15	EvN2000149	EvN no 2000149-1					leafmines	rather cultivated part of park	reared from larvae	RMNH, Naturalis Biodoversity Center		Schinus terebinthifolia	Schinus terebinthifolia	trnL+morphology	E.J. van Nieukerken	EvN4500		Male genitalia	Euparal	E.J. van Nieukerken	2014-02-05	1603		Decimal degrees	GPS	WGS84	-25.6844	-54.4453	165
RMNH.INS.24681	E.J. van Nieukerken	PreservedSpecimen	BOLD:ACN0764	Stigmella schinivora		1	1 male	adult	larva	Argentina	Misiones			Cataratas del Iguazú	E.J. van Nieukerken	2000-08-27			2000-09-14	2000-09-15	EvN2000149	EvN no 2000149-1			Holotype	Stigmella schinivora Van Nieukerken	leafmines	rather cultivated part of park	reared from larvae	RMNH, Naturalis Biodoversity Center		Schinus terebinthifolia	Schinus terebinthifolia	trnL+morphology	E.J. van Nieukerken	EvN4681		Female genitalia	Euparal	E.J. van Nieukerken	2015-01-23	1603		Decimal degrees	GPS	WGS84	-25.6844	-54.4453	165
RMNH.INS.23986	E.J. van Nieukerken	PreservedSpecimen		Stigmella schinivora		3	2 males, 1 female	adult	larva	Argentina	Misiones			Cataratas del Iguazú	E.J. van Nieukerken	2000-08-27			2000-09-11	2000-09-12	EvN2000148	EvN no 2000148-1					leafmines	rather cultivated part of park	reared from larvae	RMNH, Naturalis Biodoversity Center		Schinus terebinthifolia	Schinus terebinthifolia	trnL+morphology	E.J. van Nieukerken	EvN3986		Male genitalia	Euparal	EJvN	2009-11-20	1603		Decimal degrees	GPS	WGS84	-25.6844	-54.4453	165
BIOUG13589-E08	E.J. van Nieukerken	PreservedSpecimen	BOLD:ACN0764	Stigmella schinivora		1	1 female	adult	adult	Argentina	Misiones	Obera		CIAR	Pablo Tubaro	2013-09-26	2013-10-03				GMP#05155	GMP#05155							Malaise trap	Museo Argentino de Ciencias Naturales, Bernardino Rivadavia												1603		Decimal Degrees		WGS84	-27.445	-54.94	147
RMNH.INS.12131	E.J. van Nieukerken	PreservedSpecimen		Stigmella schinivora		1		larva	larva	Argentina	Misiones			Cataratas del Iguazú	E.J. van Nieukerken	2000-08-27					EvN2000149	EvN no 2000149-1					leafmines	rather cultivated part of park		RMNH, Naturalis Biodoversity Center	larva collection	Schinus terebinthifolia	Schinus terebinthifolia	trnL+morphology	E.J. van Nieukerken							1603		Decimal degrees	GPS	WGS84	-25.6844	-54.4453	165
RMNH.INS.12130	E.J. van Nieukerken	PreservedSpecimen		Stigmella schinivora		3		larva	dead larvae in mine	Argentina	Misiones			Cataratas del Iguazú	E.J. van Nieukerken	2000-08-27					EvN2000148	EvN no 2000148-1					leafmines	rather cultivated part of park		RMNH, Naturalis Biodoversity Center	larva collection	Schinus terebinthifolia	Schinus terebinthifolia	trnL+morphology	E.J. van Nieukerken							1603		Decimal degrees	GPS	WGS84	-25.6844	-54.4453	165
	E.J. van Nieukerken	PreservedSpecimen		Stigmella schinivora		4		leafmines	larvae	Argentina	Misiones			Cataratas del Iguazú	E.J. van Nieukerken	2000-08-27					EvN2000148	EvN no 2000148-1K					leafmines	rather cultivated part of park	reared from larvae	RMNH, Naturalis Biodoversity Center		Schinus terebinthifolia	Schinus terebinthifolia	trnL+morphology	E.J. van Nieukerken							1603		Decimal degrees	GPS	WGS84	-25.6844	-54.4453	165
	E.J. van Nieukerken	PreservedSpecimen		Stigmella schinivora		10		leafmines	vacated mines	Argentina	Misiones			Cataratas del Iguazú	E.J. van Nieukerken	2000-08-27					EvN2000148	EvN no 2000148-1H					leafmines	rather cultivated part of park		RMNH, Naturalis Biodoversity Center		Schinus terebinthifolia	Schinus terebinthifolia	trnL+morphology	E.J. van Nieukerken							1603		Decimal degrees	GPS	WGS84	-25.6844	-54.4453	165
	E.J. van Nieukerken	PreservedSpecimen		Stigmella schinivora		2		leafmines	larvae	Argentina	Misiones			Cataratas del Iguazú	E.J. van Nieukerken	2000-08-27					EvN2000149	EvN no 2000149-1K					leafmines	rather cultivated part of park	reared from larvae	RMNH, Naturalis Biodoversity Center		Schinus terebinthifolia	Schinus terebinthifolia	trnL+morphology	E.J. van Nieukerken							1603		Decimal degrees	GPS	WGS84	-25.6844	-54.4453	165
BIOUG12989-H09	E.J. van Nieukerken	PreservedSpecimen	BOLD:ACN0764	Stigmella schinivora	BIN Taxonomy Match	1		adult	adult	Argentina	Misiones	Obera		CIAR	Pablo Tubaro	2013-05-23	2013-05-30				GMP#05146	GMP#05146		specimen not examined					Malaise Trap	Museo Argentino de Ciencias Naturales, Bernardino Rivadavia												1608		Decimal Degrees		WGS84	-27.4447	-54.94	147
BIOUG13317-B04	E.J. van Nieukerken	PreservedSpecimen	BOLD:ACN0764	Stigmella schinivora	BIN Taxonomy Match	1		adult	adult	Argentina	Misiones	Obera		CIAR	Pablo Tubaro	2013-07-18	2013-07-25				GMP#04812	GMP#04812		specimen not examined, no photo					Malaise Trap	Museo Argentino de Ciencias Naturales, Bernardino Rivadavia												1608		Decimal Degrees		WGS84	-27.445	-54.94	147
BIOUG13418-F06	E.J. van Nieukerken	PreservedSpecimen	BOLD:ACN0764	Stigmella schinivora	BIN Taxonomy Match	1		adult	adult	Argentina	Misiones	Obera		CIAR	Pablo Tubaro	2013-08-01	2013-08-08				GMP#04813	GMP#04813		specimen not examined, no photo					Malaise trap	Museo Argentino de Ciencias Naturales, Bernardino Rivadavia												1608		Decimal Degrees		WGS84	-27.445	-54.94	147
BIOUG13418-G07	E.J. van Nieukerken	PreservedSpecimen	BOLD:ACN0764	Stigmella schinivora	BIN Taxonomy Match	1		adult	adult	Argentina	Misiones	Obera		CIAR	Pablo Tubaro	2013-08-08	2013-08-08				GMP#04813	GMP#04813		specimen not examined, no photo					Malaise trap	Museo Argentino de Ciencias Naturales, Bernardino Rivadavia												1608		Decimal Degrees		WGS84	-27.445	-54.94	147
BIOUG13418-H11	E.J. van Nieukerken	PreservedSpecimen	BOLD:ACN0764	Stigmella schinivora	BIN Taxonomy Match	1		adult	adult	Argentina	Misiones	Obera		CIAR	Pablo Tubaro	2013-08-08	2013-08-08				GMP#04813	GMP#04813		specimen not examined, no photo					Malaise trap	Museo Argentino de Ciencias Naturales, Bernardino Rivadavia												1608		Decimal Degrees		WGS84	-27.445	-54.94	147
BIOUG13420-A11	E.J. van Nieukerken	PreservedSpecimen	BOLD:ACN0764	Stigmella schinivora	BIN Taxonomy Match	1		adult	adult	Argentina	Misiones	Obera		CIAR	Pablo Tubaro	2013-08-08	2013-08-08				GMP#04813	GMP#04813		specimen not examined, no photo					Malaise trap	Museo Argentino de Ciencias Naturales, Bernardino Rivadavia												1608		Decimal Degrees		WGS84	-27.445	-54.94	147
BIOUG13421-G02	E.J. van Nieukerken	PreservedSpecimen	BOLD:ACN0764	Stigmella schinivora	BIN Taxonomy Match	1		adult	adult	Argentina	Misiones	Obera		CIAR	Pablo Tubaro	2013-08-08	2013-08-08				GMP#04813	GMP#04813		specimen not examined, no photo					Malaise trap	Museo Argentino de Ciencias Naturales, Bernardino Rivadavia												1608		Decimal Degrees		WGS84	-27.445	-54.94	147
BIOUG23823-E01	E.J. van Nieukerken	PreservedSpecimen	BOLD:ACN0764	Stigmella schinivora	BIN Taxonomy Match	1		adult	adult	Argentina	Misiones	Obera		CIAR	Pablo Tubaro	2013-06-26	2013-07-04				GMP#05149	GMP#05149		specimen not examined, no photo					Malaise trap	Museo Argentino de Ciencias Naturales, Bernardino Rivadavia												1608		Decimal Degrees		WGS84	-27.4447	-54.9403	147
BIOUG23823-E11	E.J. van Nieukerken	PreservedSpecimen	BOLD:ACN0764	Stigmella schinivora	BIN Taxonomy Match	1		adult	adult	Argentina	Misiones	Obera		CIAR	Pablo Tubaro	2013-06-26	2013-07-04				GMP#05149	GMP#05149		specimen not examined, no photo					Malaise trap	Museo Argentino de Ciencias Naturales, Bernardino Rivadavia												1608		Decimal Degrees		WGS84	-27.4447	-54.9403	147
BIOUG24501-C12	E.J. van Nieukerken	PreservedSpecimen	BOLD:ACN0764	Stigmella schinivora	BIN Taxonomy Match	1		adult	adult	Argentina	Misiones	Obera		CIAR	Pablo Tubaro	2013-07-11	2013-07-18				GMP#05150	GMP#05150		specimen not examined, no photo					Malaise trap	Museo Argentino de Ciencias Naturales, Bernardino Rivadavia												1608		Decimal Degrees		WGS84	-27.445	-54.94	147
BIOUG24505-B08	E.J. van Nieukerken	PreservedSpecimen	BOLD:ACN0764	Stigmella schinivora	BIN Taxonomy Match	1		adult	adult	Argentina	Misiones	Obera		CIAR	Pablo Tubaro	2013-07-11	2013-07-18				GMP#05150	GMP#05150		specimen not examined, no photo					Malaise trap	Museo Argentino de Ciencias Naturales, Bernardino Rivadavia												1608		Decimal Degrees		WGS84	-27.445	-54.94	147
BIOUG24746-D11	E.J. van Nieukerken	PreservedSpecimen	BOLD:ACN0764	Stigmella schinivora	BIN Taxonomy Match	1		adult	adult	Argentina	Misiones	Obera		CIAR	Pablo Tubaro	2013-07-25	2013-08-01				GMP#05151	GMP#05151		specimen not examined, no photo					Malaise trap	Museo Argentino de Ciencias Naturales, Bernardino Rivadavia												1608		Decimal Degrees		WGS84	-27.4447	-54.94	147
BIOUG24746-E04	E.J. van Nieukerken	PreservedSpecimen	BOLD:ACN0764	Stigmella schinivora	BIN Taxonomy Match	1		adult	adult	Argentina	Misiones	Obera		CIAR	Pablo Tubaro	2013-07-25	2013-08-01				GMP#05151	GMP#05151		specimen not examined, no photo					Malaise trap	Museo Argentino de Ciencias Naturales, Bernardino Rivadavia												1608		Decimal Degrees		WGS84	-27.4447	-54.94	147
BIOUG24746-E06	E.J. van Nieukerken	PreservedSpecimen	BOLD:ACN0764	Stigmella schinivora	BIN Taxonomy Match	1		adult	adult	Argentina	Misiones	Obera		CIAR	Pablo Tubaro	2013-07-25	2013-08-01				GMP#05151	GMP#05151		specimen not examined, no photo					Malaise trap	Museo Argentino de Ciencias Naturales, Bernardino Rivadavia												1608		Decimal Degrees		WGS84	-27.4447	-54.94	147
BIOUG24746-H10	E.J. van Nieukerken	PreservedSpecimen	BOLD:ACN0764	Stigmella schinivora	BIN Taxonomy Match	1		adult	adult	Argentina	Misiones	Obera		CIAR	Pablo Tubaro	2013-07-25	2013-08-01				GMP#05151	GMP#05151		specimen not examined, no photo					Malaise trap	Museo Argentino de Ciencias Naturales, Bernardino Rivadavia												1608		Decimal Degrees		WGS84	-27.4447	-54.94	147
BIOUG24913-G01	E.J. van Nieukerken	PreservedSpecimen	BOLD:ACN0764	Stigmella schinivora	BIN Taxonomy Match	1		adult	adult	Argentina	Misiones	Obera		CIAR	Pablo Tubaro	2013-08-22	2013-08-29				GMP#04815	GMP#04815		specimen not examined, no photo					Malaise trap	Museo Argentino de Ciencias Naturales, Bernardino Rivadavia												1608		Decimal Degrees		WGS84	-27.4447	-54.94	147
BIOUG24948-E10	E.J. van Nieukerken	PreservedSpecimen	BOLD:ACN0764	Stigmella schinivora	BIN Taxonomy Match	1		adult	adult	Argentina	Misiones	Obera		CIAR	Pablo Tubaro	2013-10-17	2013-10-24				GMP#04819	GMP#04819		specimen not examined, no photo					Malaise trap	Museo Argentino de Ciencias Naturales, Bernardino Rivadavia												1608		Decimal Degrees		WGS84	-27.445	-54.94	147
BIOUG24952-A07	E.J. van Nieukerken	PreservedSpecimen	BOLD:ACN0764	Stigmella schinivora	BIN Taxonomy Match	1		adult	adult	Argentina	Misiones	Obera		CIAR	Pablo Tubaro	2013-10-17	2013-10-24				GMP#04819	GMP#04819		specimen not examined, no photo					Malaise trap	Museo Argentino de Ciencias Naturales, Bernardino Rivadavia												1608		Decimal Degrees		WGS84	-27.445	-54.94	147
BIOUG25104-F01	E.J. van Nieukerken	PreservedSpecimen	BOLD:ACN0764	Stigmella schinivora	BIN Taxonomy Match	1		adult	adult	Argentina	Misiones	Obera		CIAR	Pablo Tubaro	2013-09-05	2013-09-12				GMP#04816	GMP#04816		specimen not examined, no photo					Malaise trap	Museo Argentino de Ciencias Naturales, Bernardino Rivadavia												1608		Decimal Degrees		WGS84	-27.4447	-54.94	147
BIOUG25104-F02	E.J. van Nieukerken	PreservedSpecimen	BOLD:ACN0764	Stigmella schinivora	BIN Taxonomy Match	1		adult	adult	Argentina	Misiones	Obera		CIAR	Pablo Tubaro	2013-09-05	2013-09-12				GMP#04816	GMP#04816		specimen not examined, no photo					Malaise trap	Museo Argentino de Ciencias Naturales, Bernardino Rivadavia												1608		Decimal Degrees		WGS84	-27.4447	-54.94	147
BIOUG25154-H01	E.J. van Nieukerken	PreservedSpecimen	BOLD:ACN0764	Stigmella schinivora	BIN Taxonomy Match	1		adult	adult	Argentina	Misiones	Obera		CIAR	Pablo Tubaro	2013-09-19	2013-09-26				GMP#04817	GMP#04817		specimen not examined, no photo					Malaise trap	Museo Argentino de Ciencias Naturales, Bernardino Rivadavia												1608		Decimal Degrees		WGS84	-27.4447	-54.94	147
[truncated: 8 more columns]
